# Supplementary material
Source: PubMed Central journal article supplement (PMC2832983)
Supplement: supp_M109.076786_jbc.M109.076786-1.pdf [file supp_M109.076786_jbc.M109.076786-1.pdf]

**Table 1***Yeast strains —*

| Strains | Genotype                                                                                                      | Source                   |
|---------|---------------------------------------------------------------------------------------------------------------|--------------------------|
| RJD1877 | <i>MAT<math>\alpha</math> can1-100, RPN11::LEU2, his3-11, 15, trp1-1, ura3-1, ade2-1, rho+</i>                | Verma, <i>et al</i> Ref. |
| RJD1786 | <i>MAT<math>\alpha</math> can1-100, Leu2-3, -112, his3-11, 15, tr1-1, ura3-1, ade2-1, rho+ mpr1-1</i>         | Verma, <i>et al</i>      |
| RJD1878 | <i>MAT<math>\alpha</math> can1-100,, rpn11<sup>AXA</sup>::LEU2, his3-11, 15, trp1-1, ura3-1, ade2-1, rho+</i> | Verma, <i>et al</i>      |
| HLY336  | RJD1877 + <i>PRE1</i> -FLAG (integrated)                                                                      | This study               |
| HLY337  | RJD1786 + <i>PRE1</i> -FLAG (integrated)                                                                      | This study               |
| HLY338  | RJD1878 + <i>PRE1</i> -FLAG (integrated)                                                                      | This study               |
| HLY357  | HLY336 + <i>RPN1</i> -GFP-HA (integrated)                                                                     | This study               |
| HLY358  | HLY337 + <i>RPN1</i> -GFP-HA (integrated)                                                                     | This study               |
| HLY359  | HLY338 + <i>RPN1</i> -GFP-HA (integrated)                                                                     | This study               |
| HLY450  | RJD1877 + FLAG- <i>RPN7</i> (integrated)                                                                      | This study               |
| HLY451  | RJD1786 + FLAG- <i>RPN7</i> (integrated)                                                                      | This study               |
| HLY452  | RJD1878 + FLAG- <i>RPN7</i> (integrated)                                                                      | This study               |
| LRY288  | RJD1877 + p <i>CUPI</i> -Pre1-FLAG                                                                            | This study               |
| LRY289  | RJD1786 + p <i>CUPI</i> -Pre1-FLAG                                                                            | This study               |
| HLY228  | RJD1878 + p <i>CUPI</i> -Pre1-FLAG                                                                            | This study               |
| ACY6    | HLY336 + pCBGST1                                                                                              | This study               |
| ACY7    | HLY336 + pCBGST1-C <sup>Rpn11</sup> (residues 267-306)                                                        | This study               |
| ACY8    | HLY337 + pCBGST1                                                                                              | This study               |
| ACY9    | HLY337 + pCBGST1-C <sup>Rpn11</sup> (residues 267-306)                                                        | This study               |
| ACY10   | HLY338 + pCBGST1                                                                                              | This study               |
| ACY11   | HLY338 + pCBGST1-C <sup>Rpn11</sup> (residues 267-306)                                                        | This study               |
| ACY12   | RJD1877 + pCBGST1+ p <i>GAL</i> -Ub-Arg- $\beta$ -galactosidase                                               | This study               |
| ACY13   | RJD1786 + pCBGST1-C <sup>Rpn11</sup> (residues 267-306)+ p <i>GAL</i> -Ub-Arg- $\beta$ -galactosidase         | This study               |
| ACY14   | RJD1878 + pCBGST1 + p <i>GAL</i> -Ub-Arg- $\beta$ -galactosidase                                              | This study               |
| ACY15   | RJD1877 + pCBGST1-C <sup>Rpn11</sup> (residues 267-306)+ p <i>GAL</i> -Ub-Arg- $\beta$ -galactosidase         | This study               |
| ACY18   | RJD1877 + pCBGST1 + p <i>GAL</i> -Ub-Met- $\beta$ -galactosidase                                              | This study               |
| ACY19   | RJD1786 + pCBGST1-C <sup>Rpn11</sup> (residues 267-306)+ p <i>GAL</i> -Ub-Met- $\beta$ -galactosidase         | This study               |
| ACY20   | RJD1878 + pCBGST1 + p <i>GAL</i> -Ub-Met- $\beta$ -galactosidase                                              | This study               |
| ACY21   | RJD1877 + pCBGST1-C <sup>Rpn11</sup> (residues 267-306)+ p <i>GAL</i> -Ub-Met- $\beta$ -galactosidase         | This study               |
| ACY31   | RJD1786 + p <i>CUPI</i> -FLAG-Rpn11::2 $\mu$ ::URA3                                                           | This study               |
| ACY36   | HLY450 + pCBGST1::2 $\mu$ ::HIS3                                                                              | This study               |

|        |                                                                     |            |
|--------|---------------------------------------------------------------------|------------|
| ACY37  | HLY450 + pCBGST1-C <sup>Rpn11</sup> (residues 267-306) :: 2μ:: HIS3 | This study |
| ACY38  | HLY451 + pCBGST1:: 2μ:: HIS3                                        | This study |
| ACY39  | HLY451 + pCBGST1-C <sup>Rpn11</sup> (residues 267-306) :: 2μ:: HIS3 | This study |
| ACY44  | RJD1877 + pCUPI-FLAG-Rad23                                          | This study |
| ACY45  | RJD1786 + pCUPI-FLAG-Rad23                                          | This study |
| ACY46  | RJD1878 + pCUPI-FLAG-Rad23                                          | This study |
| ACY138 | RJD1877 + pCUPI-FLAG-Ddi1                                           | This study |
| ACY139 | RJD1786 + pCUPI-FLAG-Ddi1                                           | This study |
| ACY140 | RJD1878 + pCUPI-FLAG-Ddi1                                           | This study |
| ACY171 | RJD1877 + pCUPI-FLAG-Dsk2                                           | This study |
| ACY172 | RJD1786 + pCUPI-FLAG-Dsk2                                           | This study |
| ACY173 | RJD1878 + pCUPI-FLAG-Dsk2                                           | This study |
