# Supplementary material
Source: PubMed Central journal article supplement (PMC2832983)
Supplement: supp_M109.076786_jbc.M109.076786-2.pdf [file supp_M109.076786_jbc.M109.076786-2.pdf]

**Table 2***Plasmids* —

| Plasmid | Description                                                                             | Source                         |
|---------|-----------------------------------------------------------------------------------------|--------------------------------|
| pJD416  | Yiplac211- <i>PRE1</i> -FLAG partially linearized with <i>BsmI</i>                      | J. Dohmen                      |
| LEP55   | p <i>CUPI</i> -Pre1-FLAG                                                                | This Study                     |
| HEP82   | Yiplac204-FLAG- <i>RPN7</i> linearized with <i>MscI</i>                                 | This study                     |
| KEP1050 | pBSHU- <i>RPN1</i> -GFP HA linearized with <i>SacI</i> and <i>XhoI</i>                  | Wendler, <i>et al.</i> Ref 46  |
| LEP451  | p <i>CUPI</i> - pCBGST1-C <sup>Rpn11</sup> (residues 267-306) :: 2 $\mu$ :: <i>TRP1</i> | This study                     |
| KEP737  | p <i>CUPI</i> - pCBGST1:: 2 $\mu$ :: <i>TRP1</i>                                        | This study                     |
| AEP1    | p <i>CUPI</i> - pCBGST1-C <sup>Rpn11</sup> (residues 267-306) :: 2 $\mu$ :: <i>HIS3</i> | This study                     |
| AEP2    | p <i>CUPI</i> - pCBGST1:: 2 $\mu$ :: <i>HIS3</i>                                        | This study                     |
| LEP56   | p <i>CUPI</i> -FLAG-Rad23:: 2 $\mu$ :: <i>TRP1</i>                                      | <i>Chen. et al.</i> , Ref 39   |
| AEP27   | p <i>CUPI</i> -FLAG-Ddi1:: 2 $\mu$ :: <i>TRP1</i>                                       | This study                     |
| AEP46   | p <i>CUPI</i> -FLAG-Dsk2:: 2 $\mu$ :: <i>TRP1</i>                                       | This study                     |
| KEP534  | p <i>GAL</i> -Ub-Arg- $\beta$ -galactosidase :: <i>URA3</i>                             | Bachmair, <i>et al.</i> Ref 32 |
| KEP530  | p <i>GAL</i> -Ub-Met- $\beta$ -galactosidase :: <i>URA3</i>                             | Bachmair, <i>et al.</i> Ref 32 |
